# Supplementary material for: A long-term dataset of simulated epilimnion and hypolimnion temperatures in 401 French lakes (1959–2020)
Source: Copernicus journal article supplement (doi:10.5194/essd-15-5631-2023), 2023-12-12
Supplement: Supplementary file 1 [file essd-15-5631-2023-supplement.pdf]

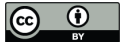

*Supplement of*

## **A long-term dataset of simulated epilimnion and hypolimnion temperatures in 401 French lakes (1959–2020)**

**Najwa Sharaf et al.**

*Correspondence to:* Najwa Sharaf ([najwa.sharaf@inrae.fr](mailto:najwa.sharaf@inrae.fr)), Nathalie Reynaud ([nathalie.reynaud@inrae.fr](mailto:nathalie.reynaud@inrae.fr)), Thierry Tormos ([thierry.tormos@ofb.gouv.fr](mailto:thierry.tormos@ofb.gouv.fr)), and Rosalie Bruel ([rosalie.brueel@ofb.gouv.fr](mailto:rosalie.brueel@ofb.gouv.fr))

The copyright of individual parts of the supplement might differ from the article licence.

**Table S1: Initial filling years for reservoirs ( $n = 302$ ), gravel pits ( $n = 7$ ) and other artificial lakes ( $n = 38$ ) of the LakeTSim dataset. The natural lakes from the dataset ( $n = 54$ ) are also listed with NA in the other fields. “lake\_type” includes the identification code of each lake as referred to in the PLAN\_DEAU database (Pôle R&D ECLA, Aix-en-Provence). “type” includes the type of the lake (Reservoir, Gravel pit, Artificial or Natural). “year\_source\_cfbr” is the year of initial filling as listed in <https://www.barrages-cfbr.eu>. “year\_PLAN\_DEAU” is the year of initial filling as listed in the PLAN\_DEAU database (heterogeneity in sources). “year\_final” is the year used in this paper, by default “year\_source\_cfbr”. When “year\_source\_cfbr” was not available, “year\_PLAN\_DEAU” was used. NA indicates that no information was available and/or not relevant (in the case of natural lakes). “year\_final” is the year used in this paper. For the “year\_final”, a value of <1900 is considered when terms of specific periods or centuries are referenced. The column “stakeholders” gives, when relevant, the manager of the dam or lake.**

| lake_code | type       | year_source_cfbr | year_PLAN_DEAU | year_final | stakeholders                                                                    |
|-----------|------------|------------------|----------------|------------|---------------------------------------------------------------------------------|
| ABB39     | Natural    | NA               | NA             | NA         | NA                                                                              |
| AGE23     | Reservoir  | 1982             | 1981           | 1982       | EDF: Electricité de France                                                      |
| AIG15     | Reservoir  | 1947             | 1945           | 1947       | EDF: Electricité de France                                                      |
| AIG73     | Natural    | NA               | NA             | NA         | NA                                                                              |
| AIL02     | Reservoir  | 1984             | 1983           | 1984       | Syndicat Mixte des Vallées de l'Ailette et de la Bièvre                         |
| ALB85     | Reservoir  | 1964             | 1964           | 1964       | SAUR: Syndicat intercommunal pour l'utilisation des eaux de la forêt du Mervent |
| ALE2B     | Reservoir  | 1970             | 1970           | 1970       | NA                                                                              |
| ALL01     | Reservoir  | 1960             | 1960           | 1960       | EDF: Electricité de France                                                      |
| ALZ81     | Reservoir  | NA               | 2000           | 2000       | NA                                                                              |
| AMA10     | Reservoir  | 1990             | 1986           | 1990       | EPTB Seine: Etablissement public territorial de bassin Seine                    |
| AME55     | Artificial | NA               | NA             | NA         | NA                                                                              |
| ANG85     | Reservoir  | 1951             | 1951           | 1951       | SIAEP de l'Angle Guignard<br>Lyonnaise des eaux                                 |
| ANN74     | Natural    | NA               | NA             | NA         | NA                                                                              |

|              |            |      |                            |       |                                                       |
|--------------|------------|------|----------------------------|-------|-------------------------------------------------------|
| <b>ANT74</b> | Natural    | NA   | NA                         | NA    | NA                                                    |
| <b>APR85</b> | Reservoir  | NA   | 1966                       | 1966  | NA                                                    |
| <b>ARC41</b> | Reservoir  | NA   | NA                         | NA    | NA                                                    |
| <b>ARD62</b> | Artificial | NA   | Start of the XIXth century | <1900 | NA                                                    |
| <b>ARG19</b> | Reservoir  | 1957 | 1957                       | 1957  | EDF: Electricité de France                            |
| <b>ARJ40</b> | Artificial | NA   | 1985                       | 1985  | NA                                                    |
| <b>ART64</b> | Reservoir  | 1929 | 1929                       | 1929  | SHEM: Société Hydro-Électrique du Midi                |
| <b>ARZ56</b> | Reservoir  | 1970 | 1970                       | 1970  | NA                                                    |
| <b>AST32</b> | Reservoir  | 1976 | 1976                       | 1976  | NA                                                    |
| <b>AUD62</b> | Artificial | NA   | XVIIIth century            | <1900 | NA                                                    |
| <b>AUL13</b> | Natural    | NA   | NA                         | NA    | NA                                                    |
| <b>AUM44</b> | Reservoir  | NA   | NA                         | NA    | NA                                                    |
| <b>AUR40</b> | Natural    | NA   | NA                         | NA    | NA                                                    |
| <b>AVE34</b> | Reservoir  | NA   | 1964                       | 1964  | NA                                                    |
| <b>AYD63</b> | Natural    | NA   | NA                         | NA    | NA                                                    |
| <b>AYG64</b> | Reservoir  | 1994 | 1996                       | 1994  | Institution Adour                                     |
| <b>BAD65</b> | Reservoir  | 1996 | 1996                       | 1996  | CACG: Compagnie d'Aménagement des Coteaux de Gascogne |
| <b>BAG12</b> | Reservoir  | 1952 | 1952                       | 1952  | EDF: Electricité de France                            |
| <b>BAI08</b> | Reservoir  | NA   | 1833                       | 1833  | VNF: Voies Navigables de France                       |
| <b>BAN81</b> | Reservoir  | 1979 | 1978                       | 1979  | Compagnie générale des eaux                           |
| <b>BAR32</b> | Reservoir  | NA   | 1990                       | 1990  | NA                                                    |
| <b>BAY58</b> | Reservoir  | NA   | 1838                       | 1838  | NA                                                    |

|              |            |      |         |       |                                                                                 |
|--------------|------------|------|---------|-------|---------------------------------------------------------------------------------|
| <b>BCL12</b> | Reservoir  | 1948 | 1948    | 1948  | EDF: Electricité de France                                                      |
| <b>BCM65</b> | Reservoir  | 2006 | 2007    | 2006  | NA                                                                              |
| <b>BDB40</b> | Reservoir  | NA   | 1987    | 1987  | NA                                                                              |
| <b>BEA36</b> | Reservoir  | NA   | NA      | NA    | NA                                                                              |
| <b>BEA53</b> | Artificial | NA   | NA      | NA    | NA                                                                              |
| <b>BEL36</b> | Reservoir  | NA   | NA      | NA    | NA                                                                              |
| <b>BIM13</b> | Reservoir  | 1952 | 1952    | 1952  | SCP: Société du Canal de Provence                                               |
| <b>BIS40</b> | Natural    | NA   | NA      | NA    | NA                                                                              |
| <b>BIS73</b> | Reservoir  | 1935 | 1935    | 1935  | EDF: Electricité de France                                                      |
| <b>BLA40</b> | Natural    | NA   | NA      | NA    | NA                                                                              |
| <b>BLC19</b> | Reservoir  | 1927 | 1927    | 1927  | EDF: Electricité de France                                                      |
| <b>BLE65</b> | Natural    | NA   | NA      | NA    | NA                                                                              |
| <b>BLI36</b> | Reservoir  | NA   | Ancient | <1900 | NA                                                                              |
| <b>BLI44</b> | Reservoir  | NA   | NA      | NA    | NA                                                                              |
| <b>BMC16</b> | Reservoir  | 2000 | 2000    | 2000  | SAUR: Syndicat intercommunal pour l'utilisation des eaux de la forêt du Mervent |
| <b>BMM78</b> | Artificial | NA   | NA      | NA    | NA                                                                              |
| <b>BMS40</b> | Reservoir  | NA   | 1993    | 1993  | NA                                                                              |
| <b>BOR33</b> | Artificial | NA   | 1964    | 1964  | NA                                                                              |
| <b>BOR63</b> | Natural    | NA   | NA      | NA    | NA                                                                              |
| <b>BOS22</b> | Reservoir  | 1838 | 1832    | 1838  | Conseil régional de Bretagne                                                    |
| <b>BOU27</b> | Gravel pit | NA   | NA      | NA    | NA                                                                              |

|              |            |      |               |       |                                                                     |
|--------------|------------|------|---------------|-------|---------------------------------------------------------------------|
| <b>BOU33</b> | Artificial | NA   | 1950          | 1950  | NA                                                                  |
| <b>BOU35</b> | Reservoir  | NA   | Before 1804   | <1900 | NA                                                                  |
| <b>BOU43</b> | Natural    | NA   | NA            | NA    | NA                                                                  |
| <b>BOU63</b> | Natural    | NA   | NA            | NA    | NA                                                                  |
| <b>BOU66</b> | Reservoir  | 1910 | 1910          | 1910  | SHEM: Société Hydro-Électrique du Midi                              |
| <b>BOU73</b> | Natural    | NA   | NA            | NA    | NA                                                                  |
| <b>BOU88</b> | Reservoir  | 1939 | 1939          | 1939  | VNF: Voies Navigables de France                                     |
| <b>BOU89</b> | Reservoir  | 1905 | 1905          | 1905  | VNF: Voies Navigables de France                                     |
| <b>BRA47</b> | Reservoir  | NA   | 1989          | 1989  | NA                                                                  |
| <b>BSA58</b> | Reservoir  | 1969 | 1969          | 1969  | Syndicat intercommunal de la Terre-Plaine-Morvan/Lyonnaise des eaux |
| <b>BSF31</b> | Reservoir  | 1675 | 1675          | 1675  | VNF: Voies Navigables de France                                     |
| <b>BSJ32</b> | Reservoir  | NA   | 1989          | 1989  | NA                                                                  |
| <b>BUJ87</b> | Reservoir  | 1963 | 1962          | 1963  | EDF: Electricité de France                                          |
| <b>BUL85</b> | Reservoir  | 1994 | 1994          | 1994  | SIAEP des Vals de Sèvres<br>Compagnie générale des eaux             |
| <b>CAE35</b> | Reservoir  | NA   | 1997          | 1997  | NA                                                                  |
| <b>CAI65</b> | Reservoir  | 1940 | 1940          | 1940  | SHEM: Société Hydro-Électrique du Midi                              |
| <b>CAL2B</b> | Reservoir  | 1968 | 1968          | 1968  | EDF: Electricité de France                                          |
| <b>CAM81</b> | Reservoir  | 1958 | 1956          | 1958  | Institution des Eaux de la Montagne Noire                           |
| <b>CAN32</b> | Reservoir  | NA   | 1997          | 1997  | NA                                                                  |
| <b>CAR35</b> | Reservoir  | NA   | XIIth century | <1900 | NA                                                                  |
| <b>CAR66</b> | Reservoir  | NA   | 1994          | 1994  | NA                                                                  |

|              |           |      |               |       |                                                                                 |
|--------------|-----------|------|---------------|-------|---------------------------------------------------------------------------------|
| <b>CAR83</b> | Reservoir | 1934 | 1935          | 1934  | Société des eaux de Toulon (Veolia Eau)                                         |
| <b>CAS04</b> | Reservoir | 1948 | 1948          | 1948  | EDF: Electricité de France                                                      |
| <b>CAS63</b> | Natural   | NA   | NA            | NA    | NA                                                                              |
| <b>CAU19</b> | Reservoir | 1976 | 1976          | 1976  | Communauté d'agglomération du Bassin de Brive                                   |
| <b>CAZ23</b> | Reservoir | NA   | NA            | NA    | NA                                                                              |
| <b>CAZ40</b> | Natural   | NA   | NA            | NA    | NA                                                                              |
| <b>CDL65</b> | Reservoir | 1952 | 1953          | 1952  | EDF: Electricité de France                                                      |
| <b>CEB79</b> | Reservoir | NA   | 1982          | 1982  | NA                                                                              |
| <b>CER21</b> | Reservoir | 1836 | 1836          | 1836  | VNF: Voies Navigables de France                                                 |
| <b>CHA19</b> | Reservoir | 1951 | 1951          | 1951  | EDF: Electricité de France                                                      |
| <b>CHA21</b> | Reservoir | 1984 | 1983          | 1984  | SAUR: Syndicat intercommunal pour l'utilisation des eaux de la forêt du Mervent |
| <b>CHA23</b> | Reservoir | 1951 | 1951          | 1951  | EDF: Electricité de France                                                      |
| <b>CHA25</b> | Reservoir | 1953 | 1953          | 1953  | Société des Forces Motrices du Châtelot                                         |
| <b>CHA35</b> | Reservoir | NA   | XIIth century | <1900 | NA                                                                              |
| <b>CHA38</b> | Reservoir | 1935 | 1937          | 1935  | EDF: Electricité de France                                                      |
| <b>CHA39</b> | Natural   | NA   | NA            | NA    | NA                                                                              |
| <b>CHA48</b> | Reservoir | 1994 | 1934          | 1994  | Commune de Mende                                                                |
| <b>CHA52</b> | Reservoir | 1906 | 1906          | 1906  | VNF: Voies Navigables de France                                                 |
| <b>CHA58</b> | Reservoir | 1933 | 1932          | 1933  | EDF: Electricité de France                                                      |
| <b>CHA63</b> | Natural   | NA   | NA            | NA    | NA                                                                              |
| <b>CHA86</b> | Reservoir | NA   | 1919          | 1919  | NA                                                                              |

|              |            |      |             |       |                                          |
|--------------|------------|------|-------------|-------|------------------------------------------|
| <b>CHA87</b> | Reservoir  | NA   | 1935        | 1935  | NA                                       |
| <b>CHE18</b> | Artificial | NA   | NA          | NA    | NA                                       |
| <b>CHE23</b> | Reservoir  | 1984 | NA          | 1984  | EDF: Electricité de France               |
| <b>CHE38</b> | Reservoir  | NA   | 1979        | 1979  | NA                                       |
| <b>CHE73</b> | Reservoir  | NA   | 1952        | 1952  | NA                                       |
| <b>CHO04</b> | Reservoir  | NA   | 1952        | 1952  | NA                                       |
| <b>COD2B</b> | Reservoir  | 1984 | NA          | 1984  | Office d'Equipement Hydraulique de Corse |
| <b>COI39</b> | Reservoir  | 1971 | 1971        | 1971  | EDF: Electricité de France               |
| <b>COM23</b> | Reservoir  | NA   | 1928        | 1928  | NA                                       |
| <b>COM40</b> | Artificial | NA   | 1985        | 1985  | NA                                       |
| <b>COR22</b> | Reservoir  | NA   | 1869        | 1869  | NA                                       |
| <b>COR41</b> | Reservoir  | NA   | NA          | NA    | NA                                       |
| <b>COU12</b> | Reservoir  | 1950 | 1955        | 1950  | EDF: Electricité de France               |
| <b>CRA18</b> | Reservoir  | NA   | 1962        | 1962  | NA                                       |
| <b>CRE89</b> | Reservoir  | 1932 | 1932        | 1932  | EDF: Electricité de France               |
| <b>DEV07</b> | Reservoir  | 1975 | 1974        | 1975  | NA                                       |
| <b>DRE29</b> | Reservoir  | 1981 | 1981        | 1981  | NA                                       |
| <b>DUC56</b> | Reservoir  | NA   | 1000        | 1000  | NA                                       |
| <b>ECH33</b> | Natural    | NA   | NA          | NA    | NA                                       |
| <b>ECL28</b> | Artificial | NA   | NA          | NA    | NA                                       |
| <b>EDC23</b> | Reservoir  | NA   | NA          | NA    | NA                                       |
| <b>EDC63</b> | Reservoir  | NA   | Before 1545 | <1900 | NA                                       |

|              |            |      |         |       |                                                                                |
|--------------|------------|------|---------|-------|--------------------------------------------------------------------------------|
| <b>EGM55</b> | Artificial | NA   | NA      | NA    | NA                                                                             |
| <b>EGR45</b> | Reservoir  | NA   | NA      | NA    | NA                                                                             |
| <b>EGR51</b> | Artificial | NA   | NA      | NA    | NA                                                                             |
| <b>EGU36</b> | Reservoir  | 1926 | 1926    | 1926  | EDF: Electricité de France                                                     |
| <b>ENC15</b> | Reservoir  | 1950 | 1950    | 1950  | EDF: Electricité de France                                                     |
| <b>ENT25</b> | Natural    | NA   | NA      | NA    | NA                                                                             |
| <b>EPT35</b> | Reservoir  | NA   | NA      | NA    | NA                                                                             |
| <b>ESP04</b> | Reservoir  | NA   | 1967    | 1967  | NA                                                                             |
| <b>EST11</b> | Reservoir  | NA   | 1979    | 1979  | NA                                                                             |
| <b>ETR23</b> | Reservoir  | 1933 | 1933    | 1933  | EDF: Electricité de France                                                     |
| <b>EVJ59</b> | Reservoir  | 1967 | 1968    | 1967  | DEP59: Département du Nord<br>Syndicat mixte du Parc départemental du Val Joly |
| <b>FEY19</b> | Reservoir  | NA   | NA      | NA    | NA                                                                             |
| <b>FIG2A</b> | Reservoir  | 1993 | NA      | 1993  | Office d'Equipement Hydraulique de Corse                                       |
| <b>FIL09</b> | Reservoir  | 1996 | 1996    | 1996  | NA                                                                             |
| <b>FLE87</b> | Reservoir  | 1961 | NA      | 1961  | EDF: Electricité de France                                                     |
| <b>FOU36</b> | Reservoir  | NA   | Ancient | <1900 | NA                                                                             |
| <b>GAB64</b> | Reservoir  | 2007 | 2005    | 2007  | NA                                                                             |
| <b>GAR09</b> | Reservoir  | 1985 | 1985    | 1985  | EDF: Electricité de France                                                     |
| <b>GAS14</b> | Reservoir  | NA   | 1986    | 1986  | NA                                                                             |
| <b>GDL44</b> | Natural    | NA   | NA      | NA    | NA                                                                             |
| <b>GEB69</b> | Gravel pit | NA   | NA      | NA    | NA                                                                             |
| <b>GEN82</b> | Reservoir  | NA   | 1989    | 1989  | NA                                                                             |



|               |            |      |      |      |                                                     |
|---------------|------------|------|------|------|-----------------------------------------------------|
| <b>GER88</b>  | Natural    | NA   | NA   | NA   | NA                                                  |
| <b>GIO40</b>  | Reservoir  | NA   | 1987 | 1987 | NA                                                  |
| <b>GIR73</b>  | Reservoir  | 1949 | 1948 | 1949 | EDF: Electricité de France                          |
| <b>GLC39</b>  | Natural    | NA   | NA   | NA   | NA                                                  |
| <b>GNI09</b>  | Reservoir  | 1950 | 1949 | 1950 | EDF: Electricité de France                          |
| <b>GOL12</b>  | Reservoir  | 1960 | 1960 | 1960 | EDF: Electricité de France                          |
| <b>GOR59</b>  | Artificial | NA   | 1962 | 1962 | NA                                                  |
| <b>GOU03</b>  | Reservoir  | NA   | 1838 | 1838 | NA                                                  |
| <b>GOU22</b>  | Reservoir  | 1978 | 1978 | 1978 | NA                                                  |
| <b>GOU82</b>  | Reservoir  | 1989 | NA   | 1989 | CD82: Conseil Départemental du Tarn-et-Garonne (82) |
| <b>GRA15</b>  | Reservoir  | 1959 | 1959 | 1959 | EDF: Electricité de France                          |
| <b>GRA42</b>  | Reservoir  | 1957 | 1957 | 1957 | EDF: Electricité de France                          |
| <b>GRA85</b>  | Reservoir  | 1973 | 1972 | 1973 | NA                                                  |
| <b>GRO21a</b> | Reservoir  | 1905 | 1838 | 1905 | VNF: Voies Navigables de France                     |
| <b>GRO21b</b> | Reservoir  | 1837 | 1838 | 1837 | VNF: Voies Navigables de France                     |
| <b>GUE22</b>  | Reservoir  | 1929 | 1930 | 1929 | EDF: Electricité de France                          |
| <b>HAG40</b>  | Reservoir  | 1991 | 1993 | 1991 | NA                                                  |
| <b>HAR22</b>  | Reservoir  | NA   | 1954 | 1954 | NA                                                  |
| <b>HAU19</b>  | Reservoir  | 1958 | 1958 | 1958 | EDF: Electricité de France                          |
| <b>HER51a</b> | Artificial | NA   | NA   | NA   | NA                                                  |
| <b>HER51b</b> | Artificial | NA   | NA   | NA   | NA                                                  |
| <b>HER51c</b> | Artificial | NA   | NA   | NA   | NA                                                  |

|              |            |      |               |       |                                                              |
|--------------|------------|------|---------------|-------|--------------------------------------------------------------|
| <b>HOR52</b> | Artificial | NA   | XIVth century | <1900 | NA                                                           |
| <b>ILA39</b> | Natural    | NA   | NA            | NA    | NA                                                           |
| <b>ISS07</b> | Natural    | NA   | NA            | NA    | NA                                                           |
| <b>JAB77</b> | Artificial | NA   | NA            | NA    | NA                                                           |
| <b>JOU11</b> | Artificial | NA   | NA            | NA    | NA                                                           |
| <b>JOU86</b> | Reservoir  | NA   | NA            | NA    | NA                                                           |
| <b>JUG22</b> | Reservoir  | NA   | 1239          | 1239  | NA                                                           |
| <b>LAC21</b> | Reservoir  | NA   | 1860          | 1860  | NA                                                           |
| <b>LAC33</b> | Natural    | NA   | NA            | NA    | NA                                                           |
| <b>LAC55</b> | Artificial | NA   | NA            | NA    | NA                                                           |
| <b>LAD16</b> | Reservoir  | NA   | NA            | NA    | NA                                                           |
| <b>LAF38</b> | Natural    | NA   | NA            | NA    | NA                                                           |
| <b>LAN15</b> | Reservoir  | 1962 | 1962          | 1962  | EDF: Electricité de France                                   |
| <b>LAN23</b> | Reservoir  | NA   | 1684          | 1684  | NA                                                           |
| <b>LAN66</b> | Reservoir  | NA   | 1960          | 1960  | NA                                                           |
| <b>LAN87</b> | Reservoir  | 1962 | 1963          | 1962  | EDF: Electricité de France                                   |
| <b>LAO81</b> | Reservoir  | 1965 | 1965          | 1965  | EDF: Electricité de France                                   |
| <b>LAR31</b> | Reservoir  | NA   | 1994          | 1994  | NA                                                           |
| <b>LAR87</b> | Reservoir  | 1958 | NA            | 1958  | EDF: Electricité de France                                   |
| <b>LAS15</b> | Reservoir  | 1970 | 1970          | 1970  | EDF: Electricité de France                                   |
| <b>LAT10</b> | Reservoir  | 1990 | 1989          | 1990  | EPTB Seine: Etablissement public territorial de bassin Seine |
| <b>LAU65</b> | Reservoir  | NA   | 1933          | 1933  | NA                                                           |

|               |            |      |      |      |                                                                      |
|---------------|------------|------|------|------|----------------------------------------------------------------------|
| <b>LAV16</b>  | Reservoir  | 1991 | 1989 | 1991 | NA                                                                   |
| <b>LAV23</b>  | Reservoir  | 1944 | 1943 | 1944 | EDF: Electricité de France                                           |
| <b>LAV43</b>  | Reservoir  | 1949 | 1914 | 1949 | Commune de Saint-Etienne                                             |
| <b>LDC21</b>  | Reservoir  | 1837 | 1837 | 1837 | VNF: Voies Navigables de France                                      |
| <b>LDC25</b>  | Natural    | NA   | NA   | NA   | NA                                                                   |
| <b>LDC51</b>  | Reservoir  | 1974 | 1974 | 1974 | EPTB Seine: Etablissement public territorial de bassin Seine         |
| <b>LDC63</b>  | Natural    | NA   | NA   | NA   | NA                                                                   |
| <b>LEJ85</b>  | Reservoir  | NA   | 1978 | 1978 | NA                                                                   |
| <b>LEM74</b>  | Natural    | NA   | NA   | NA   | NA                                                                   |
| <b>LEM85</b>  | Reservoir  | 1986 | 1986 | 1986 | SIAEP de la région de Mareuil sur Lay<br>Compagnie générale des eaux |
| <b>LEO40</b>  | Natural    | NA   | NA   | NA   | NA                                                                   |
| <b>LER27a</b> | Artificial | NA   | NA   | NA   | NA                                                                   |
| <b>LER27c</b> | Artificial | NA   | NA   | NA   | NA                                                                   |
| <b>LES24</b>  | Reservoir  | 1994 | 1995 | 1994 | NA                                                                   |
| <b>LET57</b>  | Artificial | NA   | NA   | NA   | NA                                                                   |
| <b>LGM27</b>  | Natural    | NA   | NA   | NA   | NA                                                                   |
| <b>LGM39</b>  | Natural    | NA   | NA   | NA   | NA                                                                   |
| <b>LIE52</b>  | Reservoir  | 1886 | 1885 | 1886 | VNF: Voies Navigables de France                                      |
| <b>LIN57</b>  | Artificial | NA   | NA   | NA   | NA                                                                   |
| <b>LIZ32</b>  | Reservoir  | NA   | 2004 | 2004 | NA                                                                   |
| <b>LKW68</b>  | Reservoir  | 1968 | 1964 | 1968 | CD68: Conseil Départemental du Haut-Rhin (68)                        |
| <b>LLI66</b>  | Natural    | NA   | NA   | NA   | NA                                                                   |

|              |            |      |              |       |                                                                                 |
|--------------|------------|------|--------------|-------|---------------------------------------------------------------------------------|
| <b>LON88</b> | Natural    | NA   | NA           | NA    | NA                                                                              |
| <b>LOU37</b> | Reservoir  | NA   | XIth century | <1900 | NA                                                                              |
| <b>LOU64</b> | Reservoir  | 1994 | 1994-1997    | 1994  | NA                                                                              |
| <b>LPC38</b> | Natural    | NA   | NA           | NA    | NA                                                                              |
| <b>LQC40</b> | Artificial | NA   | 1993         | 1993  | NA                                                                              |
| <b>LRO39</b> | Natural    | NA   | NA           | NA    | NA                                                                              |
| <b>LSF43</b> | Natural    | NA   | NA           | NA    | NA                                                                              |
| <b>LSG81</b> | Reservoir  | 1992 | NA           | 1992  | SAUR: Syndicat intercommunal pour l'utilisation des eaux de la forêt du Mervent |
| <b>LUN32</b> | Reservoir  | NA   | 1991         | 1991  | NA                                                                              |
| <b>MAD55</b> | Reservoir  | 1972 | 1977         | 1972  | Société Mosellane des Eaux                                                      |
| <b>MAL90</b> | Artificial | NA   | 1500         | 1500  | NA                                                                              |
| <b>MAR19</b> | Reservoir  | NA   | NA           | NA    | NA                                                                              |
| <b>MAR21</b> | Artificial | NA   | NA           | NA    | NA                                                                              |
| <b>MAR35</b> | Reservoir  | NA   | NA           | NA    | NA                                                                              |
| <b>MAT66</b> | Reservoir  | 1960 | 1959         | 1960  | EDF: Electricité de France                                                      |
| <b>MAU12</b> | Reservoir  | 1947 | 1947         | 1947  | EDF: Electricité de France                                                      |
| <b>MEO23</b> | Reservoir  | NA   | NA           | NA    | NA                                                                              |
| <b>MER85</b> | Reservoir  | 1956 | 1956         | 1956  | NA                                                                              |
| <b>MIA24</b> | Reservoir  | 1993 | NA           | 1993  | SOGEDO: Société de Gérance de Distribution d' Eau                               |
| <b>MIC68</b> | Reservoir  | 1982 | 1982         | 1982  | NA                                                                              |
| <b>MIE32</b> | Reservoir  | 1968 | 1968         | 1968  | NA                                                                              |

|              |            |      |            |       |                                          |
|--------------|------------|------|------------|-------|------------------------------------------|
| <b>MIG65</b> | Reservoir  | 1959 | 1958       | 1959  | EDF: Electricité de France               |
| <b>MOI85</b> | Reservoir  | NA   | 1986       | 1986  | NA                                       |
| <b>MON09</b> | Reservoir  | 1985 | 1985       | 1985  | NA                                       |
| <b>MON38</b> | Reservoir  | 1962 | 1962       | 1962  | EDF: Electricité de France               |
| <b>MON63</b> | Natural    | NA   | NA         | NA    | NA                                       |
| <b>MON71</b> | Artificial | 1861 | 1861       | 1861  | VNF: Voies Navigables de France          |
| <b>MON74</b> | Natural    | NA   | NA         | NA    | NA                                       |
| <b>MON87</b> | Reservoir  | 1953 | 1953       | 1953  | EDF: Electricité de France               |
| <b>MOU52</b> | Reservoir  | 1890 | 1889       | 1890  | NA                                       |
| <b>MUS35</b> | Reservoir  | NA   | 1800       | 1800  | NA                                       |
| <b>MUT57</b> | Artificial | NA   | NA         | NA    | NA                                       |
| <b>NAG09</b> | Reservoir  | 1961 | 1959       | 1961  | EDF: Electricité de France               |
| <b>NAN01</b> | Natural    | NA   | NA         | NA    | NA                                       |
| <b>NAU48</b> | Reservoir  | 1982 | 1981       | 1982  | EPTB Loire<br>BRL Exploitation           |
| <b>NDC38</b> | Reservoir  | 1964 | 1964       | 1964  | EDF: Electricité de France               |
| <b>NOY56</b> | Reservoir  | NA   | 1964       | 1964  | NA                                       |
| <b>ORE65</b> | Reservoir  | 1883 | 1882       | 1883  | SHEM: Société Hydro-Électrique du Midi   |
| <b>ORX40</b> | Reservoir  | NA   | 1985       | 1985  | NA                                       |
| <b>OSP2A</b> | Reservoir  | 1979 | 1979       | 1979  | Office d'Equipement Hydraulique de Corse |
| <b>OUE35</b> | Reservoir  | NA   | 1832       | 1832  | NA                                       |
| <b>OUL65</b> | Reservoir  | 1923 | 1924       | 1923  | SHEM: Société Hydro-Électrique du Midi   |
| <b>PAI35</b> | Reservoir  | NA   | Middle-Age | <1900 | NA                                       |

|              |           |      |      |      |                                                              |
|--------------|-----------|------|------|------|--------------------------------------------------------------|
| <b>PAL07</b> | Reservoir | 1954 | 1954 | 1954 | EDF: Electricité de France                                   |
| <b>PAL38</b> | Natural   | NA   | NA   | NA   | NA                                                           |
| <b>PAN21</b> | Reservoir | 1836 | 1836 | 1836 | VNF: Voies Navigables de France                              |
| <b>PAN58</b> | Reservoir | 1950 | 1950 | 1950 | EPTB Seine: Etablissement public territorial de bassin Seine |
| <b>PAR12</b> | Reservoir | 1953 | 1951 | 1953 | EDF: Electricité de France                                   |
| <b>PAR40</b> | Natural   | NA   | NA   | NA   | NA                                                           |
| <b>PAR54</b> | Reservoir | NA   | NA   | NA   | NA                                                           |
| <b>PAV63</b> | Natural   | NA   | NA   | NA   | NA                                                           |
| <b>PDF44</b> | Reservoir | NA   | 1760 | 1760 | NA                                                           |
| <b>PDH35</b> | Reservoir | NA   | NA   | NA   | NA                                                           |
| <b>PDS12</b> | Reservoir | 1952 | 1952 | 1952 | EDF: Electricité de France                                   |
| <b>PET38</b> | Natural   | NA   | NA   | NA   | NA                                                           |
| <b>PIB85</b> | Reservoir | 1979 | 1978 | 1979 | NA                                                           |
| <b>PIN12</b> | Reservoir | 1929 | NA   | 1929 | EDF: Electricité de France                                   |
| <b>PIN49</b> | Reservoir | NA   | 1977 | 1977 | NA                                                           |
| <b>PIR03</b> | Reservoir | 1846 | 1845 | 1846 | ONF: Office national des forêts                              |
| <b>PMA09</b> | Reservoir | NA   | NA   | NA   | NA                                                           |
| <b>POI44</b> | Reservoir | NA   | NA   | NA   | NA                                                           |
| <b>PON21</b> | Reservoir | NA   | 1882 | 1882 | NA                                                           |
| <b>PON22</b> | Reservoir | NA   | NA   | NA   | NA                                                           |
| <b>POU31</b> | Reservoir | NA   | 1986 | 1986 | NA                                                           |
| <b>POU43</b> | Reservoir | 1941 | 1941 | 1941 | EDF: Electricité de France                                   |

|              |            |      |      |      |                                                                                             |
|--------------|------------|------|------|------|---------------------------------------------------------------------------------------------|
| <b>PPE14</b> | Artificial | NA   | NA   | NA   | NA                                                                                          |
| <b>PRA03</b> | Reservoir  | 1970 | 1970 | 1970 | EDF: Electricité de France                                                                  |
| <b>PRA33</b> | Reservoir  | NA   | 1981 | 1981 | NA                                                                                          |
| <b>PRA66</b> | Natural    | NA   | NA   | NA   | NA                                                                                          |
| <b>PRO44</b> | Reservoir  | NA   | NA   | NA   | NA                                                                                          |
| <b>PUI18</b> | Reservoir  | NA   | 1869 | 1869 | NA                                                                                          |
| <b>PUY48</b> | Reservoir  | 1996 | NA   | 1996 | SDEA: Syndicat des Eaux et de l'Assainissement Alsace-Moselle<br>EDF: Electricité de France |
| <b>PUY65</b> | Reservoir  | 1987 | 1987 | 1987 | NA                                                                                          |
| <b>PUY66</b> | Reservoir  | 1932 | 1932 | 1932 | EDF: Electricité de France                                                                  |
| <b>QUE63</b> | Reservoir  | 1905 | 1905 | 1905 | EDF: Electricité de France                                                                  |
| <b>QUI04</b> | Reservoir  | 1974 | 1974 | 1974 | EDF: Electricité de France                                                                  |
| <b>RAB61</b> | Reservoir  | 1959 | 1959 | 1959 | EDF: Electricité de France                                                                  |
| <b>RAM23</b> | Reservoir  | NA   | NA   | NA   | NA                                                                                          |
| <b>RAS81</b> | Reservoir  | 1955 | 1954 | 1955 | NA                                                                                          |
| <b>RAV34</b> | Reservoir  | 1957 | 1957 | 1957 | EDF: Electricité de France                                                                  |
| <b>RBA36</b> | Reservoir  | 1977 | NA   | 1977 | EDF: Electricité de France                                                                  |
| <b>RBJ35</b> | Reservoir  | 1993 | 1991 | 1993 | SAUR: Syndicat intercommunal pour l'utilisation des eaux de la forêt<br>du Mervent          |
| <b>RBO63</b> | Reservoir  | 1952 | 1952 | 1952 | EDF: Electricité de France                                                                  |
| <b>RCB01</b> | Reservoir  | 1931 | 1931 | 1931 | EDF: Electricité de France                                                                  |
| <b>RCE35</b> | Reservoir  | NA   | 1982 | 1982 | NA                                                                                          |
| <b>RCM01</b> | Reservoir  | 1950 | 1949 | 1950 | EDF: Electricité de France                                                                  |

|              |            |      |         |       |                                                       |
|--------------|------------|------|---------|-------|-------------------------------------------------------|
| <b>RCS70</b> | Reservoir  | 1938 | NA      | 1938  | VNF: Voies Navigables de France                       |
| <b>RDC23</b> | Reservoir  | 1985 | 1984    | 1985  | EDF: Electricité de France                            |
| <b>RDM87</b> | Reservoir  | NA   | 1961    | 1961  | NA                                                    |
| <b>RDV35</b> | Reservoir  | NA   | 1978    | 1978  | NA                                                    |
| <b>REA13</b> | Reservoir  | 1869 | 1869    | 1869  | Commune de Marseille<br>Société des Eaux de Marseille |
| <b>REC57</b> | Reservoir  | NA   | NA      | NA    | NA                                                    |
| <b>REM25</b> | Natural    | NA   | NA      | NA    | NA                                                    |
| <b>REN36</b> | Reservoir  | NA   | Ancient | <1900 | NA                                                    |
| <b>RFB63</b> | Reservoir  | 1968 | 1955    | 1968  | EDF: Electricité de France                            |
| <b>RGM38</b> | Reservoir  | 1988 | 1986    | 1988  | EDF: Electricité de France                            |
| <b>RIN53</b> | Reservoir  | NA   | NA      | NA    | NA                                                    |
| <b>RIV35</b> | Gravel pit | NA   | NA      | NA    | NA                                                    |
| <b>RKU22</b> | Reservoir  | NA   | 1981    | 1981  | NA                                                    |
| <b>RLB11</b> | Reservoir  | NA   | 1985    | 1985  | NA                                                    |
| <b>RMC73</b> | Reservoir  | 1969 | 1968    | 1969  | EDF: Electricité de France                            |
| <b>RMN29</b> | Reservoir  | NA   | 1977    | 1977  | NA                                                    |
| <b>RMP85</b> | Reservoir  | NA   | 1971    | 1971  | NA                                                    |
| <b>RMR49</b> | Reservoir  | 1957 | 1955    | 1957  | Communauté d'Agglomération du Choletais               |
| <b>ROA36</b> | Reservoir  | 1932 | 1932    | 1932  | EDF: Electricité de France                            |
| <b>ROC03</b> | Reservoir  | 1909 | 1909    | 1909  | EDF: Electricité de France                            |
| <b>ROC85</b> | Reservoir  | NA   | 1981    | 1981  | NA                                                    |
| <b>ROC86</b> | Reservoir  | NA   | NA      | NA    | NA                                                    |



|              |            |      |               |       |                                                                   |
|--------------|------------|------|---------------|-------|-------------------------------------------------------------------|
| <b>ROM54</b> | Artificial | NA   | NA            | NA    | NA                                                                |
| <b>ROP22</b> | Reservoir  | 1937 | 1937          | 1937  | SPL Eau de Bassin Rennais                                         |
| <b>ROS73</b> | Reservoir  | 1960 | 1961          | 1960  | EDF: Electricité de France                                        |
| <b>ROU21</b> | Reservoir  | NA   | NA            | NA    | NA                                                                |
| <b>ROU81</b> | Reservoir  | 1948 | 1949          | 1948  | NA                                                                |
| <b>RPR71</b> | Reservoir  | 1959 | 1959          | 1959  | CD71: Conseil Départemental de Saône-et-Loire (71)                |
| <b>RRT23</b> | Reservoir  | 1931 | 1931          | 1931  | EDF: Electricité de France                                        |
| <b>RSM87</b> | Reservoir  | NA   | 1930          | 1930  | NA                                                                |
| <b>RST35</b> | Reservoir  | 1976 | 1975          | 1976  | Compagnie générale des eaux                                       |
| <b>RSV34</b> | Reservoir  | NA   | 1956          | 1956  | NA                                                                |
| <b>RTN71</b> | Reservoir  | NA   | 1887          | 1887  | VNF: Voies Navigables de France                                   |
| <b>RTV71</b> | Reservoir  | NA   | 1801          | 1801  | NA                                                                |
| <b>RVH22</b> | Reservoir  | 1973 | 1973          | 1973  | DEP22: Département des Côtes-d'Armor                              |
| <b>SAL34</b> | Reservoir  | 1970 | 1971          | 1970  | CD34: Conseil Départemental de l'Hérault (34)<br>BRL Exploitation |
| <b>SAR15</b> | Reservoir  | 1934 | 1934          | 1934  | EDF: Electricité de France                                        |
| <b>SAU36</b> | Reservoir  | NA   | XVIth century | <1900 | NA                                                                |
| <b>SAU38</b> | Reservoir  | 1935 | 1934          | 1935  | EDF: Electricité de France                                        |
| <b>SCA83</b> | Reservoir  | 1966 | 1966          | 1966  | EDF: Electricité de France                                        |
| <b>SCR04</b> | Reservoir  | 1974 | 1974          | 1974  | EDF: Electricité de France                                        |
| <b>SEC15</b> | Reservoir  | 1947 | 1945          | 1947  | EDF: Electricité de France                                        |
| <b>SEI10</b> | Reservoir  | 1966 | 1966          | 1966  | EPTB Seine: Etablissement public territorial de bassin Seine      |
| <b>SER63</b> | Natural    | NA   | NA            | NA    | NA                                                                |

|              |            |      |      |      |                                                                          |
|--------------|------------|------|------|------|--------------------------------------------------------------------------|
| <b>SET58</b> | Reservoir  | 1858 | 1858 | 1858 | ETAT                                                                     |
| <b>SFP53</b> | Reservoir  | NA   | 1979 | 1979 | NA                                                                       |
| <b>SID18</b> | Reservoir  | 1976 | 1976 | 1976 | CD18: Conseil Départemental du Cher (18)<br>SIAEP Marche-Boischaud       |
| <b>SIL85</b> | Reservoir  | NA   | 1999 | 1999 | NA                                                                       |
| <b>SMI29</b> | Reservoir  | NA   | 1937 | 1937 | NA                                                                       |
| <b>SOR71</b> | Reservoir  | 1971 | 1905 | 1971 | Communauté urbaine Le Creusot Montceau-les-Mines<br>Veolia Environnement |
| <b>SOU09</b> | Reservoir  | 1984 | 1984 | 1984 | EDF: Electricité de France                                               |
| <b>SOU40</b> | Natural    | NA   | NA   | NA   | NA                                                                       |
| <b>SPA87</b> | Reservoir  | NA   | 1975 | 1975 | NA                                                                       |
| <b>SPC38</b> | Reservoir  | 1957 | 1957 | 1957 | EDF: Electricité de France                                               |
| <b>SPE81</b> | Reservoir  | 1936 | 1934 | 1936 | EDF: Electricité de France                                               |
| <b>SPO04</b> | Reservoir  | 1960 | 1960 | 1960 | EDF: Electricité de France                                               |
| <b>SPO25</b> | Natural    | NA   | NA   | NA   | NA                                                                       |
| <b>SUD41</b> | Reservoir  | NA   | NA   | NA   | NA                                                                       |
| <b>SYL01</b> | Natural    | NA   | NA   | NA   | NA                                                                       |
| <b>TAI40</b> | Reservoir  | NA   | 1993 | 1993 | NA                                                                       |
| <b>TAZ63</b> | Natural    | NA   | NA   | NA   | NA                                                                       |
| <b>TOL2A</b> | Reservoir  | 1965 | 1961 | 1965 | EDF: Electricité de France                                               |
| <b>TOR82</b> | Reservoir  | 1992 | NA   | 1992 | CD82: Conseil Départemental du Tarn-et-Garonne (82)                      |
| <b>TOU27</b> | Artificial | NA   | NA   | NA   | NA                                                                       |
| <b>TOU79</b> | Reservoir  | 1995 | 1995 | 1995 | NA                                                                       |

|               |            |      |                 |       |                            |
|---------------|------------|------|-----------------|-------|----------------------------|
| <b>TRA02</b>  | Gravel pit | NA   | NA              | NA    | NA                         |
| <b>TRE19</b>  | Reservoir  | 1952 | 1951            | 1952  | EDF: Electricité de France |
| <b>TRE35</b>  | Reservoir  | NA   | NA              | NA    | NA                         |
| <b>TRI19</b>  | Reservoir  | NA   | 1945            | 1945  | NA                         |
| <b>TSC32</b>  | Reservoir  | NA   | 1968            | 1968  | NA                         |
| <b>TUI45</b>  | Reservoir  | NA   | NA              | NA    | NA                         |
| <b>TYX63</b>  | Reservoir  | NA   | NA              | NA    | NA                         |
| <b>UBY32</b>  | Reservoir  | NA   | 1973            | 1973  | NA                         |
| <b>UNK36</b>  | Reservoir  | NA   | 1981            | 1981  | NA                         |
| <b>VAL19</b>  | Reservoir  | NA   | 1949            | 1949  | NA                         |
| <b>VAL39</b>  | Natural    | NA   | NA              | NA    | NA                         |
| <b>VAL45</b>  | Reservoir  | NA   | XVIIIth century | <1900 | NA                         |
| <b>VAR72</b>  | Artificial | NA   | NA              | NA    | NA                         |
| <b>VAS87</b>  | Reservoir  | 1950 | 1950            | 1950  | EDF: Electricité de France |
| <b>VAU58</b>  | Reservoir  | NA   | 1838            | 1838  | NA                         |
| <b>VDS78a</b> | Gravel pit | NA   | NA              | NA    | NA                         |
| <b>VDS78b</b> | Gravel pit | NA   | NA              | NA    | NA                         |
| <b>VDS78c</b> | Gravel pit | NA   | NA              | NA    | NA                         |
| <b>VEN27</b>  | Artificial | NA   | NA              | NA    | NA                         |
| <b>VER38</b>  | Reservoir  | 1984 | 1984            | 1984  | EDF: Electricité de France |
| <b>VER49</b>  | Reservoir  | 1980 | 1979            | 1980  | Commune de Cholet          |
| <b>VER83</b>  | Reservoir  | 1991 | 1991            | 1991  | NA                         |

|              |            |      |                                |       |                                                                              |
|--------------|------------|------|--------------------------------|-------|------------------------------------------------------------------------------|
| <b>VEZ50</b> | Reservoir  | NA   | 1932                           | 1932  | NA                                                                           |
| <b>VFO08</b> | Reservoir  | NA   | 1948                           | 1948  | NA                                                                           |
| <b>VIA19</b> | Reservoir  | NA   | NA                             | NA    | NA                                                                           |
| <b>VIG36</b> | Reservoir  | NA   | XVIth century                  | <1900 | NA                                                                           |
| <b>VIG59</b> | Artificial | NA   | First half of the XXth century | 1950  | NA                                                                           |
| <b>VIL12</b> | Reservoir  | 1951 | 1951                           | 1951  | EDF: Electricité de France                                                   |
| <b>VIL35</b> | Reservoir  | NA   | 1995                           | 1995  | NA                                                                           |
| <b>VIL42</b> | Reservoir  | 1983 | 1984                           | 1983  | EPTB Loire<br>BRL Exploitation                                               |
| <b>VIL48</b> | Reservoir  | 1964 | 1964                           | 1964  | EDF: Electricité de France                                                   |
| <b>VIL52</b> | Reservoir  | NA   | 1905                           | 1905  | NA                                                                           |
| <b>VIL66</b> | Reservoir  | NA   | NA                             | NA    | NA                                                                           |
| <b>VIL87</b> | Reservoir  | 1962 | 1963                           | 1962  | EDF: Electricité de France                                                   |
| <b>VIN66</b> | Reservoir  | 1978 | 1977                           | 1978  | CD66: Conseil départemental des Pyrénées-Orientales (66)<br>BRL Exploitation |
| <b>VIO44</b> | Reservoir  | NA   | 1835                           | 1835  | NA                                                                           |
| <b>VOU39</b> | Reservoir  | 1968 | 1968                           | 1968  | EDF: Electricité de France                                                   |
| <b>VPR54</b> | Reservoir  | 1986 | 1985                           | 1986  | EDF: Electricité de France                                                   |
| <b>VVE70</b> | Artificial | NA   | 1978                           | 1978  | NA                                                                           |
| <b>WHI08</b> | Reservoir  | NA   | 1973                           | 1973  | NA                                                                           |
| <b>YRI40</b> | Natural    | NA   | NA                             | NA    | NA                                                                           |
| <b>ZOM57</b> | Artificial | NA   | NA                             | NA    | NA                                                                           |

---
